# Supplementary material for: Pulsed Electric Field (PEF) Enhances Iron Uptake by the Yeast Saccharomyces cerevisiae
Source: Biomolecules. 2021 Jun 7;11(6):850. doi: 10.3390/biom11060850 (PMC8227778; doi:10.3390/biom11060850)
Supplement: Supplementary file 1 [file biomolecules-11-00850-s001.zip › biomolecules-1223952-supplementary.pdf]

## Pulsed Electric Field (PEF) Enhances Iron Uptake by the Yeast *Saccharomyces cerevisiae*

Karolina Nowosad <sup>1</sup>, Monika Sujka <sup>1,\*</sup>, Urszula Pankiewicz <sup>1</sup>, Damijan Miklavčič <sup>2</sup> and Marta Arczevska <sup>3</sup>

<sup>1</sup> Department of Analysis and Evaluation of Food Quality, Faculty of Food Sciences and Biotechnology,

University of Life Sciences in Lublin, Skromna 8, 20-704 Lublin, Poland;

karo.nowosad@gmail.com (K.N.); urszula.pankiewicz@up.lublin.pl (U.P.)

<sup>2</sup> Faculty of Electrical Engineering, University of Ljubljana, Trzaska cesta 25, 1000 Ljubljana, Slovenia;

damijan.miklavcic@fe.uni-lj.si

<sup>3</sup> Department of Biophysics, Faculty of Environmental Biology, University of Life Sciences in Lublin,

Akademicka 13, 20-950 Lublin, Poland; marta.arczevska@up.lublin.pl

\* Correspondence: monika.sujka@up.lublin.pl; Tel.: +48-81-462-3333

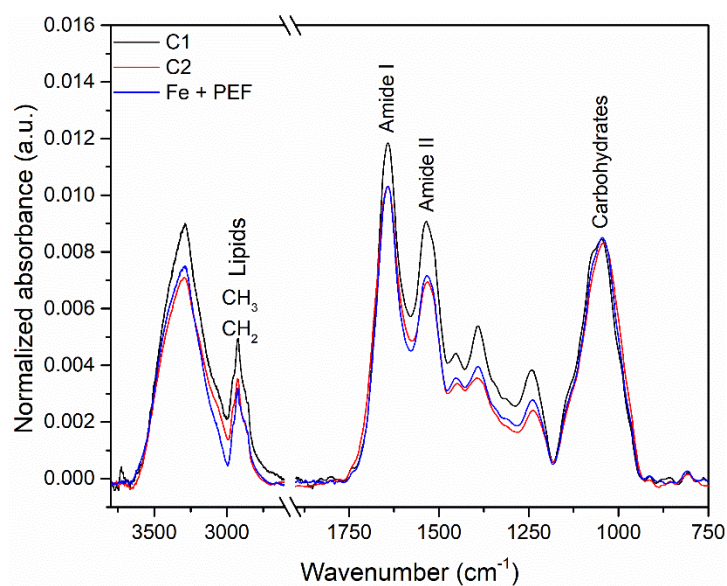

**Figure S1.** ATR FTIR spectra of all yeast samples (*S. cerevisiae*) investigated acquired in the wavenumber range from 4000 to 750 cm<sup>-1</sup>. The most prominent absorbance bands are indicated and correspond to the stretching vibrations of CH<sub>2</sub> and CH<sub>3</sub> groups in lipids, amide I (~1640 cm<sup>-1</sup>) and amide II (~1530 cm<sup>-1</sup>) bands of proteins and to the carbohydrate region between 1200 and 900 cm<sup>-1</sup>. Each spectrum presented is an average of three independent measurements and normalized for equal area between 1180 and 900 cm<sup>-1</sup>.

**Table S1.** The most important bands obtained in the spectra of yeast, and the type of vibrations with assigned sample components.

| Wavenumber [cm <sup>-1</sup> ] |        |        | Assignment of the type of vibrations                                                          |
|--------------------------------|--------|--------|-----------------------------------------------------------------------------------------------|
| C1                             | C2     | Fe+PEF |                                                                                               |
| 3286                           | 3291   | 3291   | $\nu$ (N–H), $\nu$ (O–H) amide A, water                                                       |
| 2956                           | 2955   | 2955   | $\nu_{as}$ (CH <sub>3</sub> ), lipids                                                         |
| 2924                           | 2924   | 2926   | $\nu_{as}$ (CH <sub>2</sub> ), lipids                                                         |
| 2853                           | 2853   | 2855   | $\nu_s$ (CH <sub>2</sub> ), lipids                                                            |
| 1742                           | 1741   | 1739   | $\nu$ (C=O), phospholipids                                                                    |
| 1640                           | 1642   | 1645   | 80% $\nu$ (CO), 20% $\nu$ (CN), $\tau$ (HOH), amide I, water                                  |
| 1534                           | 1532   | 1532   | 60% $\tau$ (N–H), 30% $\nu$ (C–N), 10% $\nu$ (C–C), amide II                                  |
| 1452                           | 1452   | 1451   | $\delta_{as}$ (CH <sub>3</sub> ), $\delta_{as}$ (CH <sub>2</sub> ), proteins, lipids          |
| 1392                           | 1392   | 1390   | $\delta_s$ (CH <sub>3</sub> ), $\delta_s$ (CH <sub>2</sub> ), $\nu_s$ (C=O), proteins, lipids |
| 1240                           | 1237   | 1237   | $\nu_{as}$ (PO <sub>2</sub> <sup>-</sup> ), phospholipids                                     |
| 1139                           | 1130sh | 1130sh | $\nu$ (C–O), carbohydrates                                                                    |
| 1070                           | 1070sh | 1070sh | $\nu$ (C–O), carbohydrates                                                                    |
| 1046                           | 1045   | 1045   | $\nu_s$ (PO <sub>2</sub> <sup>-</sup> ), carbohydrates                                        |

<sup>a</sup>The symbols concerning the vibrations assignment are related to the stretching vibrational mode ( $\nu$ ), deformational ( $\delta$ ); bending ( $\tau$ ), and symmetrical (s) and asymmetrical (as) modes. An assignment of spectral features was collected according to the literature [1].

## References

1. Oberg, K.A.; Ruysschaert, J.-M.; Goormaghtigh, E. The optimization of protein secondary structure determination with infrared and circular dichroism spectra. *Eur. J. Biochem.* **2004**, *271*, 2937–2948.
